# Supplementary material for: Dietary inflammatory impact on NAFLD development in obese vs. lean individuals: an analysis based on NHANES 2003–2018
Source: PubMed Central journal article supplement (PMC11619212; doi:10.1186/s12944-024-02082-4), 2024-04-29
Supplement: 12944_2024_2082_MOESM2_ESM.pdf [file 12944_2024_2082_MOESM2_ESM.pdf]

20240221180036957740673330475008

# 1 **Dietary Inflammatory Impact on NAFLD**

## 2 **Development in Obese vs. Lean Individuals: an**

### 3 **analysis based on NHANES 2003-2018 Analysis.**

#### 4

#### 5 **Abstract**

#### 6 **Background**

7 Non-alcoholic fatty liver disease (NAFLD), which is commonly linked with  
8 obesity, can also affect individuals of normal weight, a condition known as "lean  
9 NAFLD" and impose similar burdens and negative effects. However, the impact of  
10 diet on lean NAFLD remains underexplored. Our objective is to find out how the  
11 Dietary Inflammatory Index (DII) and NAFLD correlate, in the Americans, stratified  
12 by waist-to-height ratio (WHtR) together with body mass index (BMI).

#### 13 **Methods**

14 5,152 participants from the National Health and Nutrition Examination Survey  
15 (NHANES) 2003-2018 were comprised in the final analysis. Serological markers  
16 were used to define both NAFLD and advanced liver fibrosis. Lean and abdominal  
17 lean individuals were identified using BMI and WHtR, separately. DII was  
18 determined by assigning scores to 28 distinct food parameters based on their  
19 inflammatory potential, obtained from the NAHNES website. Differences across DII  
20 quartiles were evaluated using the Kruskal-Wallis H Test, Chi-Square Test along with  
21 One-Way ANOVA. The correlation between DII and NAFLD was determined by  
22 multiple regression models and subgroup analyses.

23 **Results**

24 Among the 5,152 subjects, 2,503 were diagnosed with NAFLD, with 86 cases of  
25 lean NAFLD and 8 cases of abdominal lean NAFLD. DII was shown to be positively  
26 linked with NAFLD (Odds Ratio (OR)=1.81 [1.48-2.21],  $P < 0.001$ ) and advanced  
27 liver fibrosis (OR=1.46 [1.02-2.07],  $P = 0.037$ ). Further analysis revealed that this  
28 association was primarily observed in obese/abdominal obese participants (In BMI  $\geq$   
29 25.00 kg/m<sup>2</sup>, OR=1.56 [1.23-1.98],  $P < 0.001$ . In WHtR>0.50, OR=1.48 [1.23-1.79],  
30  $P < 0.001$ .) rather than their lean counterparts. Subgroup analyses demonstrated that  
31 female individuals without a diagnosis of hypertension or diabetes appeared to be  
32 more sensitive to the rise in DII.

33 **Conclusions**

34 Our data demonstrated a substantial positive correlation between DII and  
35 NAFLD in general population. The impact of a pro-inflammatory diet appeared to be  
36 less prominent in lean individuals compared to obese ones.

37

38 **Keywords:**

39 DII, NAFLD, lean individuals, abdominal obesity, BMI, WHtR.

40

41 **Introduction**

42 Non-alcoholic fatty liver disease (NAFLD) is described as the deposit of extra fat  
43 in the liver without significant alcohol consumption or other long-term liver illnesses,  
44 including viral hepatitis or genetic liver disorders [1, 2]. Nowadays, NAFLD is the

45 <sup>1</sup> major cause of end-stage liver disease, primary liver carcinoma and demand for liver  
46 replacement surgery, placing a significant burden worldwide [3]. In addition to its  
47 well-established association with obesity, 'lean NAFLD' refers to NAFLD that affects  
48 individuals of normal weight [4, 5]. The incidence of lean NAFLD varies by region  
49 and races. A meta-analysis showed that lean NAFLD approximately accounted for  
50 19.20% of NAFLD patients worldwide (95% CI:3.70-7.00) [6]. Previous studies have  
51 indicated that lean NAFLD may exhibit comparable outcomes to conventional  
52 NAFLD or potentially even worse liver-related events and overall mortality [7]. To  
53 date, genetics, epigenetics, dietary factors, and physical exercise have all been linked  
54 to the onset of NAFLD in lean individuals by influencing metabolic flexibility and  
55 adaptability [8, 9]. However, the specific mechanisms of lean NAFLD remain unclear.  
56 Additionally, specific guidelines for lean NAFLD are absent.

57 <sup>28</sup> Recent study has demonstrated the critical function of inflammation in the onset  
58 of NAFLD [10, 11]. In humans, the inflammatory balance is maintained by cytokines  
59 including <sup>8</sup> IL-6 and IL-1, along with tumor necrosis factor-alpha (TNF- $\alpha$ ) and C-  
60 reactive protein (CRP) [12]. Disruption of this balance may lead to mild persistent  
61 inflammation and tissue damage. Diet is a key factor in modifying the inflammatory  
62 state in humans and has been widely used in NAFLD treatment. It is recommended to  
63 minimize the consumption of a typical Western eating style while promoting the  
64 adoption of a Mediterranean diet, which includes a higher intake of omega-3 as well  
65 as monounsaturated <sup>25</sup> fatty acids and a lower intake of carbohydrates, refined carbs, and  
66 sweets [13-17]. To offer the public with more precise dietary guidance, Shivappa et al

67 devised the <sup>10</sup> Dietary Inflammatory Index (DII), which is currently widely utilized to  
68 quantify the impact of an individual's diet on inflammation [18]. Previous research  
69 has revealed the substantial <sup>41</sup> link between DII and obesity [19], type 2 diabetes  
70 (T2DM) [20], hypertension [21] and <sup>17</sup> metabolic dysfunction-associated fatty liver  
71 disease (MAFLD) [22]. However, research on the relationship between DII and  
72 NAFLD in individuals with varying weights and body shapes is limited.

73 Nowadays, several non-invasive serologic tests are widely used as in diagnosing  
74 NAFLD and advanced liver fibrosis. These tests include <sup>44</sup> the Fatty Liver Index (FLI),  
75 <sup>1</sup> the US Fatty Liver Index (USFLI), the Non-Alcoholic Fatty Liver Disease Fibrosis  
76 <sup>32</sup> Score (NFS), the Fibrosis 4 Index (FIB-4), the Hepatic Steatosis Index (HSI) and the  
77 Aspartate Aminotransferase /Platelet Ratio Index (APRI). Numerous epidemiological  
78 studies [23-29] have confirmed the validity of these markers. Our objective is to  
79 explore associations between DII and NAFLD in different <sup>45</sup> body mass index (BMI)  
80 and body shapes (defined by <sup>49</sup> waist-to-height ratio (WHtR)), aiming to provide more  
81 detailed dietary advice for NAFLD.

82

## 83 **Methods**

### 84 *Population and study design*

85 NHANES, a comprehensive database which tracks the <sup>48</sup> nutritional status and  
86 <sup>20</sup> health of the Americans [30], is administered by the Centers for Disease Control and  
87 Prevention (CDC). The data for this study were obtained from the eight NHANES  
88 cycles spanned from 2003 to 2018, as they included all of the relevant variables,

89 <sup>36</sup> which were all available on the NHANES official website. The initial dataset  
 90 consisted of 80,312 individuals. Participants were excluded if they were: (1) under the  
 91 age of 18, (2) pregnant or were unable to submit a urine sample for testing, (3) had  
 92 <sup>5</sup> other chronic liver diseases (hepatitis B, C and liver carcinoma), (4) had excessive  
 93 alcohol consumption, (5) had incomplete information on crucial factors, including  
 94 dietary data, demographic, laboratory and questionnaire. Following this screening  
 95 procedure, the final research comprised 5,152 individuals (Figure 1 is our study  
 96 design).

97 ***Diagnostic Criteria and definition***

98 *Definition of NAFLD*

99 As previously stated, FLI and USFLI jointly defined NAFLD. The formula is  
 100 shown below:

$$FLI = \left( \frac{e^{0.953 \times \log_e(TG) + 0.139 \times BMI + 0.718 \times \log_e(GGT) + 0.053 \times \text{waist circumference} - 15.745}}{1 + e^{0.953 \times \log_e(TG) + 0.139 \times BMI + 0.718 \times \log_e(GGT) + 0.053 \times \text{waist circumference} - 15.745}} \right) \cdot 100 \leftarrow j$$

$$USFLI = \left( \frac{e^{0.3458 \times \text{Mexican American} - 0.8073 \times \text{non-Hispanic black} + 0.0093 \times \text{age} + 0.6151 \times \log_e(GGT) + 0.0249 \times \text{waist circumference} + 1.1792 \times \log_e(\text{mslnlr}) + 0.8242 \times \log_e(\text{glucose}) - 14.7812}}{1 + e^{0.3458 \times \text{Mexican American} - 0.8073 \times \text{non-Hispanic black} + 0.0093 \times \text{age} + 0.6151 \times \log_e(GGT) + 0.0249 \times \text{waist circumference} + 1.1792 \times \log_e(\text{mslnlr}) + 0.8242 \times \log_e(\text{glucose}) - 14.7812}} \right) \times 100$$

101  
 102 Here, TG and GGT are the abbreviations of triglycerides and gamma-glutamyl  
 103 transpeptidase, separately. In the calculation of USFLI, individuals are assigned to a  
 104 value of 1 if they are classified as 'non-Hispanic black' or 'Mexican American' and 0 if  
 105 they are not. Individuals with a FLI score  $\geq 60$  [31] or USFLI  $\geq 30$  [27] were defined  
 106 as NAFLD.

107 *The description of advanced liver fibrosis*

108 Two groups of participants with NAFLD were created based on <sup>1</sup> the NFS, FIB-4,

109 and APRI scores. The following are the formulas:

$$NFS = -1.675 + 0.037 \times age + 0.094 \times BMI + 1.13 \times IFG \text{ or } diabetes(\text{yes} = 1, \text{no} = 0) + 0.99 \times AST / ALT - 0.013 \times PLT - 0.66 \times Alb$$

$$FIB - 4 = \frac{Age \times AST}{PLT \times \sqrt{ALT}} \leftarrow$$

$$APRI = \left( \frac{AST / ULN}{PLT} \right) \times 100 \leftarrow$$

110

111 AST and ALT are initials for aspartate transaminase and alanine

112 aminotransferase, respectively. While PLT is an acronym for platelet count.

113 Participants' NFS values are calculated as follows: 0 if they do not have diabetes or

114 impaired glucose tolerance (IFG), and 1 if they do. The typical upper limit of AST is

115 denoted by ULN in the APRI computation. In NAFLD patients, NFS > 0.676 or FIB-

116 > 2.67 or APRI > 1.0 [28] were deemed indicators of advanced liver fibrosis,

117 *Definition of lean/abdominal lean and obese/ abdominal obese individuals*

118 The revised 2022 AGA Clinical Practice guidelines defined lean NAFLD as

119 NAFLD in individuals with a BMI < 25 kg/m<sup>2</sup> [32]. However, BMI alone may not

120 provide a comprehensive assessment of body fat distribution [33]. Additional

121 measures, such as the WHtR [8], body roundness index (BRI) [34], and a body shape

122 index (ABSI) [35] were also included to delineate abdominal obesity. To evaluate the

123 correlation and reliability of these markers with NAFLD, ROC curves were created

124 (Figure 2-Figure 5). WHtR and BRI appeared to be more accurate in predicting

125 NAFLD. Hence, WHtR < 0.50 [36] was used as a measurement of abdominal obesity,

126 consistent with prior research. Finally, lean NAFLD was categorized as NAFLD with

127 a BMI < 25.00 kg/m<sup>2</sup>, while obese NAFLD as having a BMI ≥ 25.00 kg/m<sup>2</sup>.

128 Meanwhile, abdominal-lean NAFLD was characterized as NAFLD having a

129 WHtR<0.5, whereas abdominal-obese NAFLD had a WHtR ≥0.5.

### 130 *Dietary assessment*

131 The creation and validation of DII has been documented elsewhere [18, 37]. DII  
132 was computed using 45 dietary factors collected from 11 different communities  
133 globally. A Z-score was calculated by normalizing each parameter's value through the  
134 removal of the database mean and division by the parameter's standard deviation.  
135 Then, by doubling and removing one (from -1 to +1 and centering on 0), the Z-score  
136 was transformed into percentile values [18, 38]. Each central percentile was then  
137 multiplied by its associated inflammatory impact score. Then, the DII scores for each  
138 dietary parameter were added to calculate an individual's DII.

139 Dietary information in NHANSE was collected via a <sup>23</sup> 24-hour recall interview  
140 done at the <sup>23</sup> mobile examination center (MEC). In this research, a total of 28 different  
141 food parameters, including dietary calorie intake, protein, carbohydrates, cholesterol,  
142 fat, fatty acids (saturated, monounsaturated and polyunsaturated), folic acid, beta-  
143 <sup>50</sup> carotene, <sup>50</sup> ω-3 and ω-6 fatty acids, <sup>14</sup> niacin, fiber, alcohol, caffeine, and various <sup>14</sup> vitamins  
144 (A, B1, B2, B6, B12, C, D, E), iron, zinc, selenium, and magnesium were employed  
145 in the calculation of DII, consistent with prior studies [39-41]. After gathering the  
146 data, the DII for each parameter was computed using the following formula:

147 
$$DII_{each\ parameter} = \left( \frac{Individual's\ intake_{each\ parameter} - Global\ daily\ mean\ intake_{each\ parameter}}{the\ Standard\ deviation\ of\ global\ daily\ mean\ intake_{each\ parameter}} \right) \times the\ inflammatory\ index_{each\ parameter}$$

148 Then, the DII of each parameter was added together to calculate a participant's overall  
149 DII. After calculating total DII, subjects were divided into quartiles: Q1: -5.20 < <sup>15</sup> DII <  
150 -0.09, Q2: -0.09 ≤ DII < 1.54, Q3: 1.54 ≤ DII < 2.90, and Q4: 2.90 ≤ DII < 5.52 for



151 further analyses.

## 152 *Covariates*

153 Demographic data, including age, gender, race, smoking habits, family income-  
154 to-poverty ratio (PIR), educational level, together with laboratory examinations such  
155 as cholesterol (TC), TG, albumin (ALB), ALT, AST, GGT, high-density lipoprotein  
156 (HDL), PLT, and other metabolic diseases including hypertension and diabetes  
157 constituted the main covariates in this study. Hypertension was characterized as: (a) a  
158 history of hypertension, or (b) systolic blood pressure (SBP)  $\geq$  140 mmhg, or (c)  
159 diastolic blood pressure (DBP)  $\geq$  90 mmhg. Diabetes was diagnosed when: (a) a prior  
160 diagnosis of diabetes, (b) a hemoglobin A1C concentration (HbA1c) above 6.4%, or  
161 (c) a fasting plasma glucose level (FPG) over 125 mg/dL, or (d) the use of insulin.

## 162 *Statistical analysis*

163 The statistical analysis in this study were conducted using R (4.3.1). Descriptive  
164 statistics were presented in various formats, including medians, averages, standard  
165 deviations, percentages and frequencies, depending on the data attributes. In table 1  
166 and 2, the Chi-Square Test was utilized to examine the qualitative characteristics,  
167 while One-Way ANOVA and the Kruskal-Wallis H Test were performed to compare  
168 data from groups with normal or non-normal distributions, separately. Then, three  
169 logistic models were employed to calculate odds ratios (OR) and 95% confidence  
170 intervals (CI). Model 1 represented the original model with no confounding factors  
171 adjusted. Model 2 accounted for the impacts of age, gender and races while Model 3  
172 refined the education level, ratio of family income to poverty (PIR), hypertension,

173 diabetes and smoking habits based on Model 2. Subgroup analyses of age, gender,  
174 hypertension<sup>1</sup> and diabetes were undertaken to assess the link between DII and  
175 NAFLD in diverse populations. All *P-values* were calculated on both sides and  
176 deemed statistically significant when below 0.05.

## 177 **Results**

### 178 *The features of participants.*<sup>5</sup>

179 Table 1 presents the baseline characteristics of the 5,152 individuals grouped by  
180 DII quartiles. Among them, 1,289 individuals were assigned to Group Q1 ( $-5.20 < \text{DII}$   
181  $< -0.09$ ), 1,282 to Group Q2 ( $-0.09 \leq \text{DII} < 1.54$ ), 1,293 to Group Q3 ( $1.54 \leq \text{DII} <$   
182  $2.90$ ), and 1,288 to Group Q4 ( $2.90 \leq \text{DII} < 5.52$ ). Significant variations were  
183 observed among the DII groups concerning gender, race, education level, PIR,  
184 smoking habits, BMI, waist circumference, WHtR, SBP, TC, HDL, ALB, ALT, GGT,  
185 PLT, hypertension, diabetes, NAFLD as well as advanced liver fibrosis ( $p < 0.05$ ).  
186 These disparities heightened with increasing DII scores.

187 Table 2 provides a complete description of both lean and obese NAFLD. Among  
188 the 2503 NAFLD patients, 86 were classified as lean NAFLD while 2417 as obese  
189 NAFLD. Lean NAFLD patients tended to be of older age, with lower DBP, higher  
190 HDL and GGT levels. Additionally, they exhibited a higher percentage of diabetes  
191 (lean NAFLD vs obese NAFLD=48.80% vs 36.80%),<sup>35</sup> and a lower percentage of  
192 advanced liver fibrosis (lean NAFLD vs obese NAFLD=9.50% vs 26.80%).  
193 Moreover, noticeable racial differences could be observed between lean and obese  
194 NAFLD. Non-Hispanic Asians exhibited a higher risk of having lean NAFLD,

195 whereas Non-Hispanic Whites were more likely to suffer from obese NAFLD.

196 ***DII levels and NAFLD.***

197 Table 3 displays the detailed information on the link between DII and NAFLD in  
198 multivariable logistic regression models, as previously discussed. NAFLD correlates  
199 positively with higher DII in all three models. The ORs of Q4 are 1.80 [1.54,2.10],  
200 1.86 [1.57,2.19], 1.81 [1.48, 2.21], in the Model 1, Model 2, Model 3 separately. All  
201 *P-values* were below 0.05.

202 Using the same method, we <sup>47</sup> evaluated the correlation between DII and advanced  
203 <sup>34</sup> liver fibrosis. Overall, a notable negative relationship was observed between higher  
204 DII and advanced liver fibrosis in all three models, especially in the highest DII group  
205 (Model 1: OR=1.67 [1.28,2.17]; Model 2: OR=1.73 [1.28, 2.34]; Model 3: OR=1.46  
206 [1.02,2.07]).

207 ***Subgroup analysis.***

208 Table 4 summarizes the findings of the subgroup analysis. Higher DII was  
209 related with an increase likelihood of NAFLD in adults both below and above the age  
210 of 60 (Q4: age $\leq$ 60, OR=1.80 [1.39,2.33];age>60, OR=1.88 [1.37, 2.60]). Generally,  
211 a higher DII elevated the risk of NAFLD in both genders, particularly in females (in  
212 group Q4: male: OR= 1.35 [1.02,1.80], female: 2.35 [1.74,3.17]). Therefore, our  
213 findings imply that women may be more vulnerable to dietary inflammation than  
214 men. Surprisingly, our findings revealed that among those without hypertension or  
215 diabetes, DII appeared to be more favorably related with risk of NAFLD.

216 ***The link between DII and lean/abdominal lean NAFLD.***

217 Table 5 contains comprehensive information regarding the relationship between  
218 DII and lean/abdominal lean NAFLD across <sup>4</sup> three logistic regression models. Model 1  
219 remained unaltered, while Model 2 was modified for age and gender. Model 3  
220 incorporated corrections for educational level, PIR, smoking habits, hypertension and  
221 diabetes based on the adjustments made in Model 2. Obviously, no statistical  
222 association could be observed between DII and lean/abdominal lean NAFLDs.  
223 However, a favorable correlation was identified between DII and obese/abdominal  
224 obese NAFLD (For BMI  $\geq 25.00\text{kg/m}^2$ , Q4: model 3: OR= 1.56 [1.23,1.98]. For  
225 WHtR  $\geq 0.5$ , Q4: model 3: OR=1.48 [1.23,1.79]).

226

## 227 Discussion

228 Plenty of studies have proven the negative impact of pro-inflammatory diets on  
229 metabolic diseases, including hypertension [42], heart failure [43], cognitive  
230 impairment [39] and diabetes [41]. More importantly, dietary inflammation has been  
231 observed to be essential for the development of fatty liver disease [22, 44]. However,  
232 further investigation into the relationship of DII and NAFLD is warranted. On the one  
233 hand, excessive alcohol consumption should be excluded as it serves as both a  
234 significant contributor to dietary inflammation and another leading cause of fatty liver  
235 disease. Neither Ting Tian [22] nor Mohsen Mazidi [44] were able to definitively rule  
236 out the direct effect of excessive alcohol intake in their studies, due to their emphasis  
237 on a spectrum of fatty liver conditions. On the other hand, two subtypes of lean  
238 NAFLD have been identified, recently. Type 1 is more common in those with

239 abdominal obesity and insulin resistance (IR), while type 2 is more commonly  
240 observed in those with monogenic disorders [45, 46]. While adopting healthy eating  
241 habits is generally recommended for all forms of NAFLDs [47], clinicians encounter  
242 challenges in selecting appropriate clinical assessments for patients with varied  
243 weights and body types. Yet limited research has explored the effect of diet on  
244 NAFLD in individuals with varying body shapes. This knowledge gap served as  
245 inspiration for our study.

246 The main conclusions of our investigation are as follow: Firstly, individuals  
247 adhering to a pro-inflammatory diet are more prone to NAFLD and severe liver  
248 fibrosis. Secondly, higher DII scores correlate with elevated BMI and WHtR.  
249 Moreover, the impact of dietary inflammation appears less pronounced in lean  
250 NAFLD compared to obese NAFLD. Finally, subgroup analysis indicates that female  
251 participants, and those without diabetes are particularly vulnerable to developing  
252 NAFLD when consuming a pro-inflammatory diet. The findings are consistent with  
253 earlier research revealing the effect of diet on chronic inflammation induction [13, 22,  
254 48] and its role in NAFLD [49].

255 In general, diets with higher DII are associated with processed foods containing  
256 increased calories, fat, cholesterol and carbs. More importantly, the accumulation of  
257 subcutaneous and visceral fat is often observed in conjunction with poor dietary habits  
258 [40]. Initially, a pro-inflammatory diet stimulates adipose tissue to produce pro-  
259 inflammatory adipokines and cytokines, including TNF- $\alpha$ , IL-1, IL-6, etc.[50, 51].  
260 These compounds cause persistent low-grade inflammation, a common etiology in

261 both obesity and NAFLD. Subsequently, these pro-inflammatory mediators increase  
262 the production of reactive oxygen and nitrogen species [52], as well as induce  
263 immunological dysfunction by altering macrophages [53, 54], exacerbating liver  
264 damage. Moreover, high DII diets have been linked to insulin resistance (IR) [41, 55]  
265 and the modification of gut flora [56]. Additionally, liver tissue exposure to prolonged  
266 free fatty acids (FFA) [57], one of the primary causes of NAFLD [58], is more  
267 common in obese people. Thus, we suppose obesity, and particularly abdominal  
268 obesity, mediates the development of NAFLD driven by pro-inflammatory diets.  
269 Conversely, dietary factors seem to have a lesser impact on lean NAFLD. We  
270 hypothesize the importance of genetic and epigenetic factors <sup>26</sup> in the onset and  
271 progression of lean NAFLD. Previous studies supported our assumption,  
272 demonstrating <sup>33</sup> that certain genetic variations, such as the G variation in PNPLA3 and  
273 the T variant in TM6SF2 are more prevalent among lean NAFLD patients [59],  
274 potentially impacting genes associated to inflammation, oxidative stress and lipid  
275 metabolism [60-62]. In a word, obese individuals may benefit more from modifying  
276 their dietary habits to prevent NAFLD, whereas lean people may require more  
277 targeted pharmacological therapies focusing on genes and downstream pathways  
278 rather than relying solely on dietary interventions. These therapies may include the  
279 use of certain anti-sense oligonucleotides, RNA interference, and medicines  
280 regulating gut flora [63]. It is encouraging that various drugs aimed at these processes  
281 are currently undergoing clinical trials, including traditional Chinese therapies such as  
282 Huazhi Fugan Granules [64], Fufang Zhenzhu Tiaozhi formula (FTZ) [65] and

283 <sup>30</sup> Chaihu-Shugan-San, Shen-Ling-Bai-Zhu-San [66].

284 <sup>1</sup> In subgroup analyses, women were observed to have higher DII diets and be  
285 more vulnerable to the adverse effects of DII. This gender-related difference may be  
286 attributed to variations in dietary patterns and food choices. Besides, <sup>1</sup> women are more  
287 likely <sup>1</sup> to weight gain, especially around <sup>1</sup> menopause, when <sup>1</sup> estrogen <sup>1</sup> levels decline,  
288 leading to increased fat storage [67]. Also, research suggests that females are less  
289 likely to be physically active <sup>27</sup> and are more prone to overeat owing to <sup>27</sup> lives and  
290 <sup>27</sup> emotional factors [68, 69], highlighting the necessity of optimizing diet structure in  
291 women. Surprisingly, in this study, DII exhibits a stronger favorable correlation with  
292 NAFLD among participants without hypertension or diabetes. This phenomenon  
293 persists even after re-testing. One possible explanation is that those with hypertension  
294 and diabetes are already metabolically impaired, displaying decreased insulin  
295 sensitivity. Consequently, modifying the existing metabolic dysfunction remains  
296 challenging even with dietary improvements. Moreover, hypertension and diabetes  
297 serve as both causes and significant consequences of NAFLD, potentially leading to  
298 collinearity issues in data processing. This may also be due to predisposition and other  
299 lifestyle variables, such as varying levels of activity or quality of sleep and so on. To  
300 sum up, even individuals who have not been diagnosed with hypertension or diabetes  
301 should adopt a healthy diet pattern. This not only reduces the chance of acquiring  
302 hypertension and diabetes, but also mitigates the possibility of NAFLD.

303 <sup>29</sup> **Strengths and limitations**

304 <sup>29</sup> A major highlight of this study is its wide scope and thorough preparation,



305 conducted within an organized multistage and cross-sectional project supervised by  
306 the NCHS. Furthermore, the program's broad inclusiveness, which includes racial  
307 diversity, ensures a robust and representative sample, thereby enhancing the  
308 dependability and quality of our research. However, some restrictions should be  
309 acknowledged. First, diagnostic uncertainty might arise owing to lack of a clear  
310 strategy or imaging data in detecting NAFLD and advanced liver fibrosis. Second, the  
311 use of questionnaires to collect data on dietary components may introduce  
312 recollection bias. Finally, despite our best efforts to adjusting for confounding  
313 variables, the potential influence of certain macronutrient-related confounders cannot  
314 be entirely avoided. However, given our attempts to reduce the impact of extraneous  
315 variables, our current findings remain valid and hold significant importance in a  
316 clinical context.

### 317 **Conclusion**

318 To sum up, this study demonstrated a notable positive connection between DII  
319 and NAFLD, as well as <sup>24</sup> its' progression to advanced liver fibrosis. Significantly, the  
320 impact of dietary inflammation on NAFLD is more pronounced in obese individuals  
321 compared to their lean counterparts. Furthermore, female participants, and those  
322 without a diagnose of hypertension and diabetes <sup>39</sup> appear to be more vulnerable to the  
323 negative effects of a pro-inflammatory diet. The clinical significance or our study is  
324 multifaced: Firstly, obese persons may derive greater benefits from adopting healthier  
325 eating patterns. Conversely, lean individuals may require more targeted  
326 pharmacological therapies on genes and their downstream pathways in further studies.



327 Secondly, the study highlights the importance of tailored dietary recommendations for  
328 specific demographic groups. Female participants and those without diagnosed  
329 hypertension or diabetes should follow a more stringent healthy eating pattern.

### 330 **Acknowledgment**

331 We appreciate the efforts of the NHANES 2003-2018 individuals in data  
332 collecting and sharing.

### 333 **Reference**

- 334 1. Hardy, T., et al., Nonalcoholic Fatty Liver Disease: Pathogenesis and Disease  
335 Spectrum. *Annual Review of Pathology: Mechanisms of Disease*, 2016. **11**(1): p. 451-496.
- 336 2. Buzzetti, E., M. Pinzani, and E.A. Tsochatzis, The multiple-hit pathogenesis of non-alcoholic  
337 fatty liver disease (NAFLD). *Metabolism*, 2016. **65**(8): p. 1038-1048.
- 338 3. Powell, E.E., V.W.-S. Wong, and M. Rinella, Non-alcoholic fatty liver disease. *The Lancet*,  
339 2021. **397**(10290): p. 2212-2224.
- 340 4. Ahadi, M., et al., A review of non-alcoholic fatty liver disease in non-obese and lean  
341 individuals. *Journal of Gastroenterology and Hepatology*, 2020. **36**(6): p. 1497-1507.
- 342 5. Yip, T.C.F., et al., Geographical similarity and differences in the burden and genetic  
343 predisposition of NAFLD. *Hepatology*, 2023. **77**(4): p. 1404-1427.
- 344 6. Ye, Q., et al., Global prevalence, incidence, and outcomes of non-obese or lean non-  
345 alcoholic fatty liver disease: a systematic review and meta-analysis. *Lancet Gastroenterol Hepatol*,  
346 2020. **5**(8): p. 739-752.
- 347 7. Dao, A.D., et al., Prevalence, characteristics, and mortality outcomes of obese and nonobese  
348 MAFLD in the United States. *Hepatol Int*, 2023. **17**(1): p. 225-236.
- 349 8. Eslam, M., et al., Metabolic (dysfunction)-associated fatty liver disease in individuals of  
350 normal weight. *Nature Reviews Gastroenterology & Hepatology*, 2022. **19**(10): p. 638-651.
- 351 9. Jang, H. and W. Kim, Non-obese or lean nonalcoholic fatty liver disease matters, but is it  
352 preventable or inevitable in light of its risk factors? *Clin Mol Hepatol*, 2023. **29**(2): p. 381-383.
- 353 10. Arrese, M., et al., Innate Immunity and Inflammation in NAFLD/NASH. *Dig Dis Sci*,  
354 2016. **61**(5): p. 1294-303.
- 355 11. Petrescu, M., et al., Chronic Inflammation-A Link between Nonalcoholic Fatty Liver  
356 Disease (NAFLD) and Dysfunctional Adipose Tissue. *Medicina (Kaunas)*, 2022. **58**(5).

- 357 12. Xiong, P., et al., Metaflammation in glucolipid metabolic disorders: Pathogenesis and  
358 treatment. *Biomed Pharmacother*, 2023. **161**: p. 114545.
- 359 13. Christ, A., M. Lauterbach, and E. Latz, Western Diet and the Immune System: An  
360 Inflammatory Connection. *Immunity*, 2019. **51**(5): p. 794-811.
- 361 14. Malesza, I.J., et al., High-Fat, Western-Style Diet, Systemic Inflammation, and Gut  
362 Microbiota: A Narrative Review. *Cells*, 2021. **10**(11).
- 363 15. Casas, R., et al., Nutrition and Cardiovascular Health. *Int J Mol Sci*, 2018. **19**(12).
- 364 16. Thoma, C., C.P. Day, and M.I. Trenell, Lifestyle interventions for the treatment of non-  
365 alcoholic fatty liver disease in adults: a systematic review. *J Hepatol*, 2012. **56**(1): p. 255-66.
- 366 17. Ryan, M.C., et al., The Mediterranean diet improves hepatic steatosis and insulin  
367 sensitivity in individuals with non-alcoholic fatty liver disease. *J Hepatol*, 2013. **59**(1): p. 138-43.
- 368 18. Shivappa, N., et al., Designing and developing a literature-derived, population-based  
369 dietary inflammatory index. *Public Health Nutr*, 2014. **17**(8): p. 1689-96.
- 370 19. Kendel Jovanović, G., et al., The Efficacy of an Energy-Restricted Anti-Inflammatory  
371 Diet for the Management of Obesity in Younger Adults. *Nutrients*, 2020. **12**(11).
- 372 20. Tan, J., et al., A Proinflammatory Diet May Increase Mortality Risk in Patients with  
373 Diabetes Mellitus. *Nutrients*, 2022. **14**(10).
- 374 21. Zhou, N., et al., The dietary inflammatory index and its association with the prevalence  
375 of hypertension: A cross-sectional study. *Front Immunol*, 2022. **13**: p. 1097228.
- 376 22. Tian, T., et al., Dietary Quality and Relationships with Metabolic Dysfunction-  
377 Associated Fatty Liver Disease (MAFLD) among United States Adults, Results from NHANES  
378 2017-2018. *Nutrients*, 2022. **14**(21).
- 379 23. Younes, R., et al., Long-term outcomes and predictive ability of non-invasive scoring  
380 systems in patients with non-alcoholic fatty liver disease. *Journal of Hepatology*, 2021. **75**(4): p.  
381 786-794.
- 382 24. Stern, C. and L. Castera, Non-invasive diagnosis of hepatic steatosis. *Hepatology*  
383 *International*, 2016. **11**(1): p. 70-78.
- 384 25. Sourianarayanan, A. and A.J. McCullough, Accuracy of steatosis and fibrosis NAFLD  
385 scores in relation to vibration controlled transient elastography: An NHANES analysis. *Clinics and*  
386 *Research in Hepatology and Gastroenterology*, 2022. **46**(7).
- 387 26. Sharma, S., Non-invasive diagnosis of advanced fibrosis and cirrhosis. *World Journal*  
388 *of Gastroenterology*, 2014. **20**(45).
- 389 27. Ruhl, C.E. and J.E. Everhart, Fatty liver indices in the multiethnic United States

- 390 National Health and Nutrition Examination Survey. *Alimentary Pharmacology & Therapeutics*,  
391 2015. **41**(1): p. 65-76.
- 392 28. Cheah, M.C.C., A.J. McCullough, and G.B.-B. Goh, Current Modalities of Fibrosis  
393 Assessment in Non-alcoholic Fatty Liver Disease. *Journal of Clinical and Translational Hepatology*,  
394 2017. **XX**(XX): p. 1-11.
- 395 29. Castera, L., M. Friedrich-Rust, and R. Loomba, Noninvasive Assessment of Liver  
396 Disease in Patients With Nonalcoholic Fatty Liver Disease. *Gastroenterology*, 2019. **156**(5): p.  
397 1264-1281 e4.
- 398 30. Ahluwalia, N., et al., Update on NHANES Dietary Data: Focus on Collection, Release,  
399 Analytical Considerations, and Uses to Inform Public Policy. *Adv Nutr*, 2016. **7**(1): p. 121-34.
- 400 31. Bedogni, G., et al., The Fatty Liver Index: a simple and accurate predictor of hepatic  
401 steatosis in the general population. *BMC Gastroenterol*, 2006. **6**: p. 33.
- 402 32. Long, M.T., M. Nouredin, and J.K. Lim, AGA Clinical Practice Update: Diagnosis and  
403 Management of Nonalcoholic Fatty Liver Disease in Lean Individuals: Expert Review.  
404 *Gastroenterology*, 2022. **163**(3): p. 764-774.e1.
- 405 33. Kim, D. and W.R. Kim, Nonobese Fatty Liver Disease. *Clinical Gastroenterology and*  
406 *Hepatology*, 2017. **15**(4): p. 474-485.
- 407 34. Rico-Martín, S., et al., Effectiveness of body roundness index in predicting metabolic  
408 syndrome: A systematic review and meta-analysis. *Obes Rev*, 2020. **21**(7): p. e13023.
- 409 35. Christakoudi, S., et al., Associations of body shape index (ABSI) and hip index with  
410 liver, metabolic, and inflammatory biomarkers in the UK Biobank cohort. *Sci Rep*, 2022. **12**(1): p.  
411 8812.
- 412 36. Browning, L.M., S.D. Hsieh, and M. Ashwell, A systematic review of waist-to-height  
413 ratio as a screening tool for the prediction of cardiovascular disease and diabetes: 0.5 could be a  
414 suitable global boundary value. *Nutr Res Rev*, 2010. **23**(2): p. 247-69.
- 415 37. Wang, T., et al., The association between Dietary Inflammatory Index and disability in  
416 older adults. *Clinical Nutrition*, 2021. **40**(4): p. 2285-2292.
- 417 38. Darbandi, M., et al., Anti-inflammatory diet consumption reduced fatty liver indices.  
418 *Sci Rep*, 2021. **11**(1): p. 22601.
- 419 39. Dong, X., et al., Association of dietary omega-3 and omega-6 fatty acids intake with  
420 cognitive performance in older adults: National Health and nutrition examination Survey  
421 (NHANES) 2011-2014. *Nutr J*, 2020. **19**(1): p. 25.
- 422 40. Tu, J., et al., Dietary inflammatory potential is associated with sarcopenia in patients  
423 with hypertension: national health and nutrition examination study. *Front Nutr*, 2023. **10**: p.

- 424 1176607.
- 425 41. Shu, Y., et al., Associations of Dietary Inflammatory Index With Prediabetes and  
426 Insulin Resistance. *Front Endocrinol (Lausanne)*, 2022. **13**: p. 820932.
- 427 42. Wu, W., et al., Association between dietary inflammation index and hypertension in  
428 participants with different degrees of liver steatosis. *Ann Med*, 2023. **55**(1): p. 2195203.
- 429 43. Liu, Z., et al., Association Between Dietary Inflammatory Index and Heart Failure:  
430 Results From NHANES (1999-2018). *Front Cardiovasc Med*, 2021. **8**: p. 702489.
- 431 44. Mazidi, M., et al., Diet with greater inflammatory potential is associated with higher  
432 prevalence of fatty liver among US adults. *European Journal of Clinical Nutrition*, 2019. **73**(12): p.  
433 1653-1656.
- 434 45. Vilarinho, S., et al., Emerging Role of Genomic Analysis in Clinical Evaluation of Lean  
435 Individuals With NAFLD. *Hepatology*, 2021. **74**(4): p. 2241-2250.
- 436 46. Orkin, S., et al., Body composition measured by bioelectrical impedance analysis is a  
437 viable alternative to magnetic resonance imaging in children with nonalcoholic fatty liver disease.  
438 *JPEN J Parenter Enteral Nutr*, 2022. **46**(2): p. 378-384.
- 439 47. Pouwels, S., et al., Non-alcoholic fatty liver disease (NAFLD): a review of  
440 pathophysiology, clinical management and effects of weight loss. *BMC Endocr Disord*, 2022.  
441 **22**(1): p. 63.
- 442 48. Barbaresco, J., et al., Dietary pattern analysis and biomarkers of low-grade  
443 inflammation: a systematic literature review. *Nutrition Reviews*, 2013. **71**(8): p. 511-527.
- 444 49. Schuster, S., et al., Triggering and resolution of inflammation in NASH. *Nature*  
445 *Reviews Gastroenterology & Hepatology*, 2018. **15**(6): p. 349-364.
- 446 50. Wang, T. and C. He, Pro-inflammatory cytokines: The link between obesity and  
447 osteoarthritis. *Cytokine Growth Factor Rev*, 2018. **44**: p. 38-50.
- 448 51. Kawai, T., M.V. Autieri, and R. Scalia, Adipose tissue inflammation and metabolic  
449 dysfunction in obesity. *American Journal of Physiology-Cell Physiology*, 2021. **320**(3): p. C375-  
450 C391.
- 451 52. Abdollahzad, H., et al., The Relationship Between the Dietary Inflammatory Index and  
452 Metabolic Syndrome in Ravansar Cohort Study. *Diabetes Metab Syndr Obes*, 2020. **13**: p. 477-487.
- 453 53. Kapellos, T.S., et al., Human Monocyte Subsets and Phenotypes in Major Chronic  
454 Inflammatory Diseases. *Front Immunol*, 2019. **10**: p. 2035.
- 455 54. Figueroa-Vega, N., et al., Analysis of the percentages of monocyte subsets and ILC2s,  
456 their relationships with metabolic variables and response to hypocaloric restriction in obesity. *PLoS*  
457 *One*, 2020. **15**(2): p. e0228637.

- 458 55. Martins, F.O. and S.V. Conde, Impact of Diet Composition on Insulin Resistance.  
459 *Nutrients*, 2022. **14**(18).
- 460 56. Lau, L.H.S. and S.H. Wong, Microbiota, Obesity and NAFLD. *Adv Exp Med Biol*,  
461 2018. **1061**: p. 111-125.
- 462 57. Dietrich, P. and C. Hellerbrand, Non-alcoholic fatty liver disease, obesity and the  
463 metabolic syndrome. *Best Practice & Research Clinical Gastroenterology*, 2014. **28**(4): p. 637-653.
- 464 58. Polyzos, S.A., J. Kountouras, and C.S. Mantzoros, Adipose tissue, obesity and non-  
465 alcoholic fatty liver disease. *Minerva Endocrinol*, 2017. **42**(2): p. 92-108.
- 466 59. Feldman, A., et al., Clinical and Metabolic Characterization of Lean Caucasian Subjects  
467 With Non-alcoholic Fatty Liver. *American Journal of Gastroenterology*, 2017. **112**(1): p. 102-110.
- 468 60. Aggeletopoulou, I., et al., Epigenetic Regulation in Lean Nonalcoholic Fatty Liver  
469 Disease. *International Journal of Molecular Sciences*, 2023. **24**(16).
- 470 61. Shen, J., et al., PNPLA3 gene polymorphism and response to lifestyle modification in  
471 patients with nonalcoholic fatty liver disease. *Journal of Gastroenterology and Hepatology*, 2014.  
472 **30**(1): p. 139-146.
- 473 62. Wong, V.W.-S., et al., Incidence of non-alcoholic fatty liver disease in Hong Kong: A  
474 population study with paired proton-magnetic resonance spectroscopy. *Journal of Hepatology*, 2015.  
475 **62**(1): p. 182-189.
- 476 63. Bluemel, S., et al., Precision medicine in alcoholic and nonalcoholic fatty liver disease  
477 via modulating the gut microbiota. *Am J Physiol Gastrointest Liver Physiol*, 2016. **311**(6): p.  
478 G1018-G1036.
- 479 64. Ye, M., et al., Alleviation of non-alcoholic fatty liver disease by Huazhi Fugan Granules  
480 is associated with suppression of TLR4/NF- $\kappa$ B signaling pathway. *Clínica e Investigación en*  
481 *Arteriosclerosis (English Edition)*, 2021. **33**(5): p. 257-266.
- 482 65. Wang, H., et al., FTZ attenuates liver steatosis and fibrosis in the minipigs with type 2  
483 diabetes by regulating the AMPK signaling pathway. *Biomedicine & Pharmacotherapy*, 2021. **138**.
- 484 66. Yang, Q.-H., et al., Effects of Chaihu-Shugan-San and Shen-Ling-Bai-Zhu-San on p38  
485 MAPK Pathway in Kupffer Cells of Nonalcoholic Steatohepatitis. *Evidence-Based Complementary*  
486 *and Alternative Medicine*, 2014. **2014**: p. 1-8.
- 487 67. Zhao, Q., et al., The Relationship between the Dietary Inflammatory Index (DII) and  
488 Metabolic Syndrome (MetS) in Middle-Aged and Elderly Individuals in the United States.  
489 *Nutrients*, 2023. **15**(8).
- 490 68. Sokol, A., et al., Association between the dietary inflammatory index, waist-to-hip ratio  
491 and metabolic syndrome. *Nutr Res*, 2016. **36**(11): p. 1298-1303.

492           69. Meyer, M.L., et al., Polycystic Ovary Syndrome Signs and Metabolic Syndrome in  
493 Premenopausal Hispanic/Latina Women: the HCHS/SOL Study. *J Clin Endocrinol Metab*, 2020.  
494 **105**(3): p. e447-56.  
495

14%

SIMILARITY INDEX

---

PRIMARY SOURCES

---

|   |                                                                                                                                                                                                                                                                 |                 |
|---|-----------------------------------------------------------------------------------------------------------------------------------------------------------------------------------------------------------------------------------------------------------------|-----------------|
| 1 | <a href="http://www.mdpi.com">www.mdpi.com</a><br>Internet                                                                                                                                                                                                      | 54 words — 1%   |
| 2 | Lurao Li, Yun Yi, Xiawen Shu, Jianghui Li, Hui Kang, Ying Chang. "The Correlation Between Serum Copper and Non-alcoholic Fatty Liver Disease in American Adults: an Analysis Based on NHANES 2011 to 2016", Biological Trace Element Research, 2024<br>Crossref | 51 words — 1%   |
| 3 | <a href="http://www.researchgate.net">www.researchgate.net</a><br>Internet                                                                                                                                                                                      | 20 words — < 1% |
| 4 | <a href="http://bmcendocrdisord.biomedcentral.com">bmcendocrdisord.biomedcentral.com</a><br>Internet                                                                                                                                                            | 19 words — < 1% |
| 5 | <a href="http://assets.researchsquare.com">assets.researchsquare.com</a><br>Internet                                                                                                                                                                            | 16 words — < 1% |
| 6 | "Steatohepatitis Clinical Themes", Hepatology, 2013<br>Crossref                                                                                                                                                                                                 | 15 words — < 1% |
| 7 | <a href="http://lipidworld.biomedcentral.com">lipidworld.biomedcentral.com</a><br>Internet                                                                                                                                                                      | 14 words — < 1% |
| 8 | <a href="http://pjms.org.pk">pjms.org.pk</a><br>Internet                                                                                                                                                                                                        | 14 words — < 1% |

---

|    |                                                                                                                                                                                                                                                                   |                 |
|----|-------------------------------------------------------------------------------------------------------------------------------------------------------------------------------------------------------------------------------------------------------------------|-----------------|
| 9  | <a href="http://www.acc.org">www.acc.org</a><br>Internet                                                                                                                                                                                                          | 14 words — < 1% |
| 10 | <a href="http://pubmed.ncbi.nlm.nih.gov">pubmed.ncbi.nlm.nih.gov</a><br>Internet                                                                                                                                                                                  | 13 words — < 1% |
| 11 | <a href="http://www.nature.com">www.nature.com</a><br>Internet                                                                                                                                                                                                    | 13 words — < 1% |
| 12 | Rohit Hariharan, Emmanuel Nene Odjidja, David Scott, Nitin Shivappa, James R. Hébert, Allison Hodge, Barbora Courten. "The dietary inflammatory index, obesity, type 2 diabetes, and cardiovascular risk factors and diseases", Obesity Reviews, 2021<br>Crossref | 12 words — < 1% |
| 13 | <a href="http://bmcpublichealth.biomedcentral.com">bmcpublichealth.biomedcentral.com</a><br>Internet                                                                                                                                                              | 12 words — < 1% |
| 14 | <a href="http://link.springer.com">link.springer.com</a><br>Internet                                                                                                                                                                                              | 12 words — < 1% |
| 15 | <a href="http://www.frontiersin.org">www.frontiersin.org</a><br>Internet                                                                                                                                                                                          | 12 words — < 1% |
| 16 | Ana M. López-Sobaler, Aránzazu Aparicio, Javier Aranceta-Bartrina, Ángel Gil et al. "Overweight and General and Abdominal Obesity in a Representative Sample of Spanish Adults: Findings from the ANIBES Study", BioMed Research International, 2016<br>Crossref  | 11 words — < 1% |
| 17 | <a href="http://article.imrpess.com">article.imrpess.com</a><br>Internet                                                                                                                                                                                          | 11 words — < 1% |
| 18 | <a href="http://journals.plos.org">journals.plos.org</a><br>Internet                                                                                                                                                                                              | 11 words — < 1% |



- 19 [www.ejh.it](http://www.ejh.it) Internet 11 words — < 1%
- 
- 20 [www.researchsquare.com](http://www.researchsquare.com) Internet 11 words — < 1%
- 
- 21 [www.tandfonline.com](http://www.tandfonline.com) Internet 11 words — < 1%
- 
- 22 Pierre Bedossa, Rami Moucari, Emna Chelbi, Tarik Asselah et al. "Evidence for a role of nonalcoholic steatohepatitis in hepatitis C: A prospective study", *Hepatology*, 2007 Crossref 10 words — < 1%
- 
- 23 [ijponline.biomedcentral.com](http://ijponline.biomedcentral.com) Internet 10 words — < 1%
- 
- 24 Azam Doustmohammadian, Bahareh Amirkalali, Saeed Esfandyari, Nima Motamed et al. "The association between dietary inflammatory index (DII) scores and c-reactive protein (CRP) and nonalcoholic fatty liver disease (NAFLD) in a general population cohort", *Clinical Nutrition ESPEN*, 2024 Crossref 9 words — < 1%
- 
- 25 Maryam Taghdir, Akram Salehi, Karim Parastouei, Sepideh Abbaszadeh. "Relationship between diet quality and nonalcoholic fatty liver disease predictor indices in Iranian patients with metabolic syndrome: A cross-sectional study", *Food Science & Nutrition*, 2023 Crossref 9 words — < 1%
- 
- 26 Ramy Younes, Elisabetta Bugianesi. "NASH in Lean Individuals", *Seminars in Liver Disease*, 2019 Crossref 9 words — < 1%

---

27 Weihua Dong, Man Qing-qing, Zhang Jian, Liu Zhen, Gong Wei-yi, Zhao Li-yun, SONG Peng-kun, Ding Gang-qiang. "Association between the Dietary Inflammatory Index and Hypertension in Middle-Aged and Elderly population in China: Results from a nation-wide cross sectional study", Research Square Platform LLC, 2023  
Crossref Posted Content 9 words — < 1%

---

28 covid19dataportal.es  
Internet 9 words — < 1%

---

29 www.gavinpublishers.com  
Internet 9 words — < 1%

---

30 www.wjgnet.com  
Internet 9 words — < 1%

---

31 www.xiahepublishing.com  
Internet 9 words — < 1%

---

32 Ho Soo Chun, Minjong Lee, Jae Seung Lee, Hye Won Lee et al. "Metabolic dysfunction associated fatty liver disease identifies subjects with cardiovascular risk better than nonalcoholic fatty liver disease", Liver International, 2022  
Crossref 8 words — < 1%

---

33 Na Wu, Xiangyu Zhai, Fan Yuan, Jie Li, Dong Li, Jianying Wang, Lei Zhang, Yi Shi, Guang Ji, Guang He, Baocheng Liu. "Genetic variation in TBC1 domain family member 1 gene associates with the risk of lean NAFLD via high-density lipoprotein", Frontiers in Genetics, 2023  
Crossref 8 words — < 1%

---

34 Qianwen Zhao, Yunlei Deng, Rong Gong, Ting Chen, Li Yang. "Association between dietary 8 words — < 1%

inflammatory index and risk of fatty liver disease: A systematic review and meta-analysis", Digestive and Liver Disease, 2023

Crossref

35 Thanita Thongtan, Anasua Deb, Wasawat Vutthikraivit, Passisd Laoveeravat, Thammasak Mingbunjersuk, Sameer Islam, Ebtesam Islam. "Antiplatelet therapy associated with lower prevalence of advanced liver fibrosis in non-alcoholic fatty liver disease: A systematic review and meta-analysis", Indian Journal of Gastroenterology, 2022

Crossref

36 Wei Li, Haitao Xiao, Hong Wu, Xuewen Xu, Yange Zhang. "Organophosphate pesticide exposure and biomarkers of liver injury/liver function", Liver International, 2022

Crossref

37 [bmcgeriatr.biomedcentral.com](https://www.bmcgeriatr.biomedcentral.com)

Internet

38 [journals.lww.com](https://journals.lww.com)

Internet

39 [worldwidescience.org](https://www.worldwidescience.org)

Internet

40 [www.tara.tcd.ie](https://www.tara.tcd.ie)

Internet

41 "Metabolic Syndrome", Springer Science and Business Media LLC, 2023

Crossref

42 Mohammad Shafi Kuchay, José Ignacio Martínez-Montoro, Narendra Singh Choudhary, José Carlos Fernández-García et al. "Non-Alcoholic Fatty Liver Disease in

## Lean and Non-Obese Individuals: Current and Future Challenges", Biomedicines, 2021

Crossref

---

43 "55th EASD Annual Meeting of the European Association for the Study of Diabetes", Diabetologia, 2019 6 words — < 1%

Crossref

---

44 Achuthan Sourianarayananane, Arthur J McCullough. "Accuracy of Steatosis and Fibrosis NAFLD scores in relation to Vibration Controlled Transient Elastography: an NHANES analysis", Clinics and Research in Hepatology and Gastroenterology, 2022 6 words — < 1%

Crossref

---

45 Harry Muhammad, Marleen van Baak, Edwin Mariman, Dian Sulistyoningrum, Emy Huriyati, Yi Lee, Wan Wan Muda. "Dietary Inflammatory Index Score and Its Association with Body Weight, Blood Pressure, Lipid Profile, and Leptin in Indonesian Adults", Nutrients, 2019 6 words — < 1%

Crossref

---

46 Lee, Yong-ho, Kyu Sik Jung, Seung Up Kim, Hye-jin Yoon, Yu Jung Yun, Byung-Wan Lee, Eun Seok Kang, Kwang-Hyub Han, Hyun Chul Lee, and Bong-Soo Cha. "Sarcopaenia is associated with NAFLD independently of obesity and insulin resistance: Nationwide surveys (KNHANES 2008–2011)", Journal of Hepatology, 2015. 6 words — < 1%

Crossref

---

47 Leila Nikniaz, Zeinab Nikniaz, Nitin Shivappa, James R. Hébert. "The association between dietary inflammatory index and metabolic syndrome components in Iranian adults", Primary Care Diabetes, 2018 6 words — < 1%

Crossref

---

48 Mingkun Yang, Shenhui Miao, Weihang Hu, Jing Yan. "Association between the dietary inflammatory index and all-cause and cardiovascular mortality in patients with atherosclerotic cardiovascular disease", Nutrition, Metabolism and Cardiovascular Diseases, 2023 6 words — < 1%  
Crossref

---

49 Nawoda Hewage, Udaya Wijesekara, Rasika Perera. "Determining the best method for evaluating obesity and the risk for non-communicable diseases in women of childbearing age by measuring the body mass index, waist circumference, waist-to-hip ratio, waist-to-height ratio, A Body Shape Index, and hip index", Nutrition, 2023 6 words — < 1%  
Crossref

---

50 Rachel S. Bergmans, Kristen M. Malecki. "The association of dietary inflammatory potential with depression and mental well-being among U.S. adults", Preventive Medicine, 2017 6 words — < 1%  
Crossref

---

EXCLUDE QUOTES OFF

EXCLUDE SOURCES OFF

EXCLUDE BIBLIOGRAPHY ON

EXCLUDE MATCHES OFF
